# Supplementary figures and images for: Bias correction and Bayesian analysis of aggregate counts in SAGE libraries
Source: Springer Nature journal article supplement (doi:10.1186/1471-2105-11-72), 2010-02-03

AE cleavage site

mRNA transcript

Pr.(Tag forms)

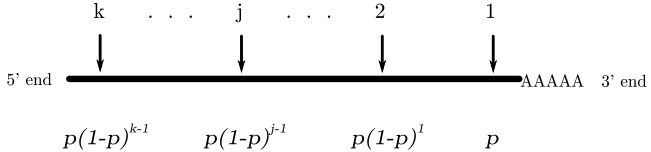

Supplement: 12859_2009_3529_MOESM2_ESM.pdf [file 12859_2009_3529_MOESM2_ESM.pdf]

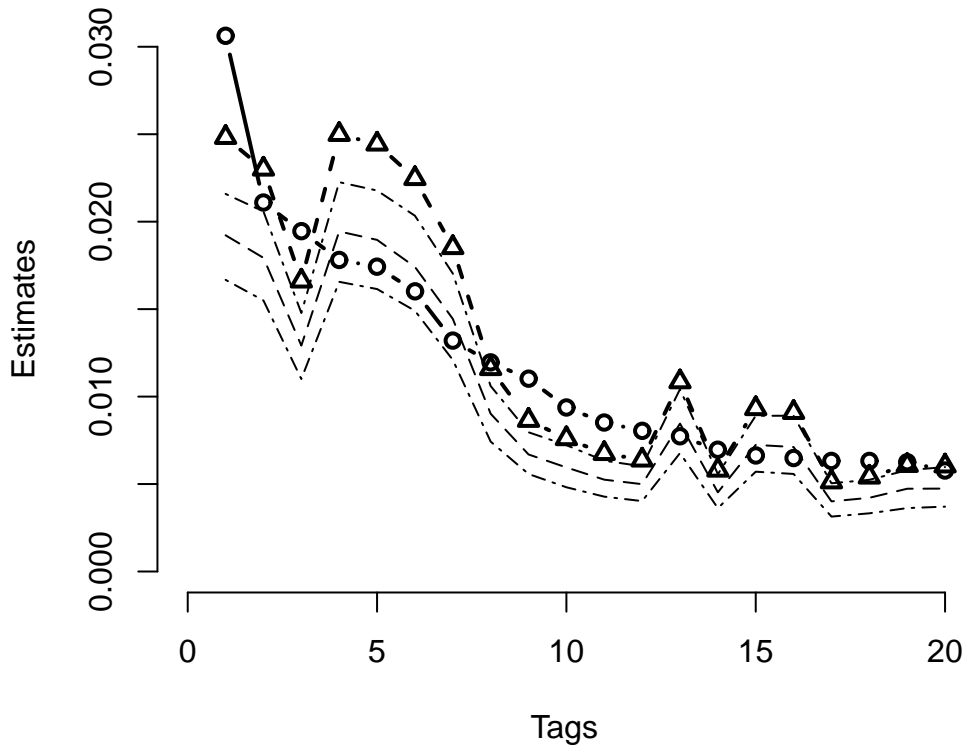

Supplement: 12859_2009_3529_MOESM3_ESM.pdf [file 12859_2009_3529_MOESM3_ESM.pdf]

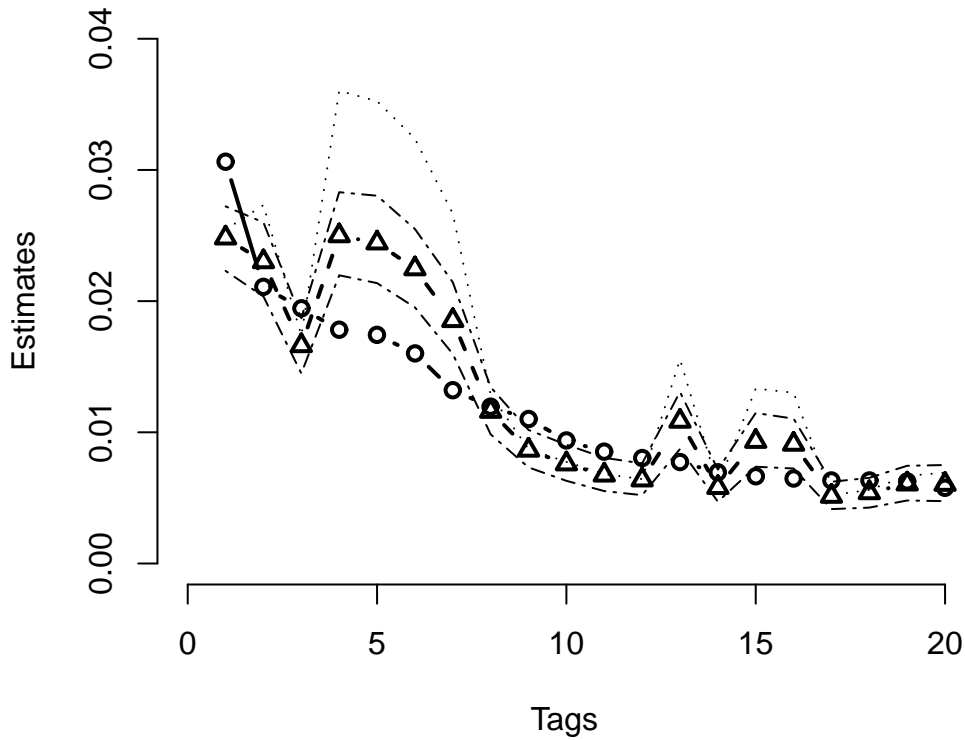

Supplement: 12859_2009_3529_MOESM4_ESM.pdf [file 12859_2009_3529_MOESM4_ESM.pdf]

### Flat prior

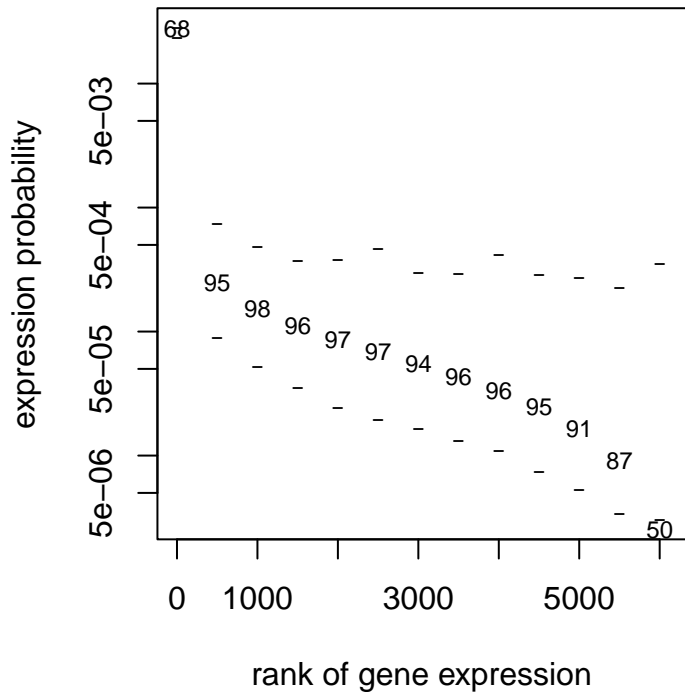

### Tub prior

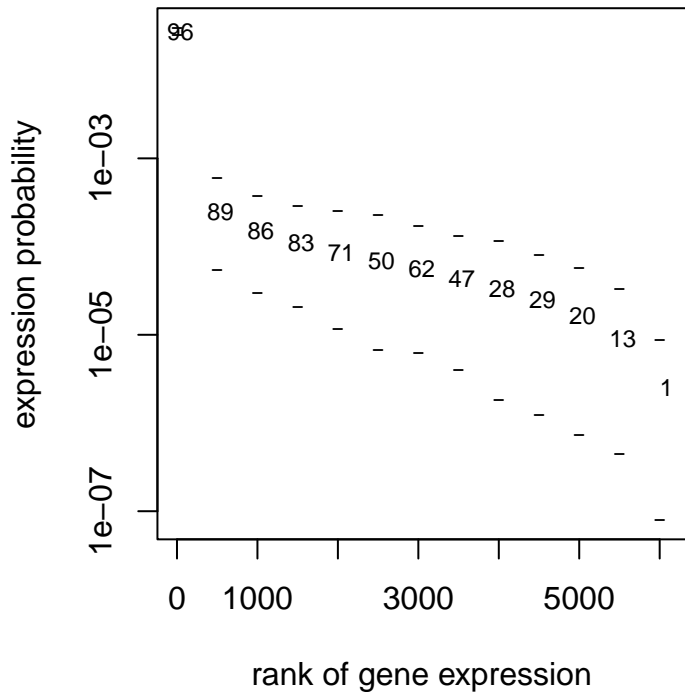

Supplement: 12859_2009_3529_MOESM5_ESM.pdf [file 12859_2009_3529_MOESM5_ESM.pdf]

**Gene2**  
**Flat Prior**

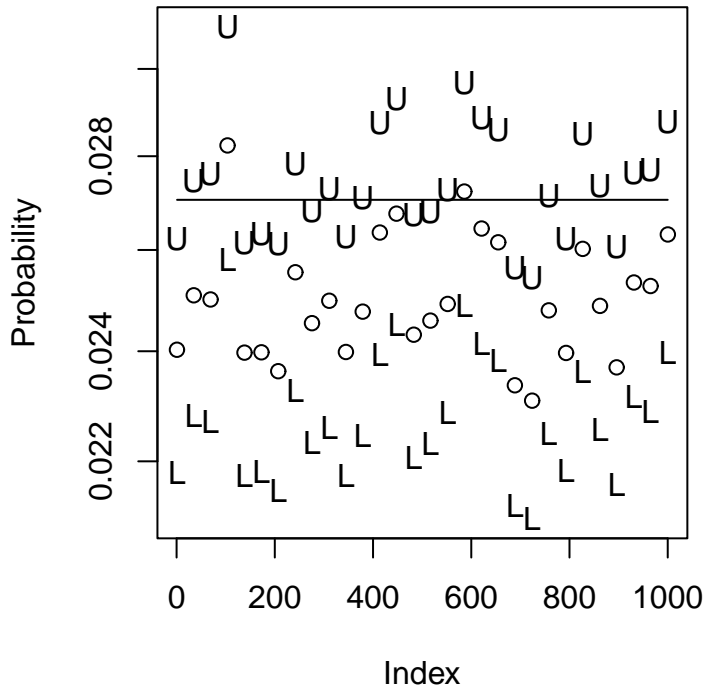

**Gene2**  
**Tub Prior**

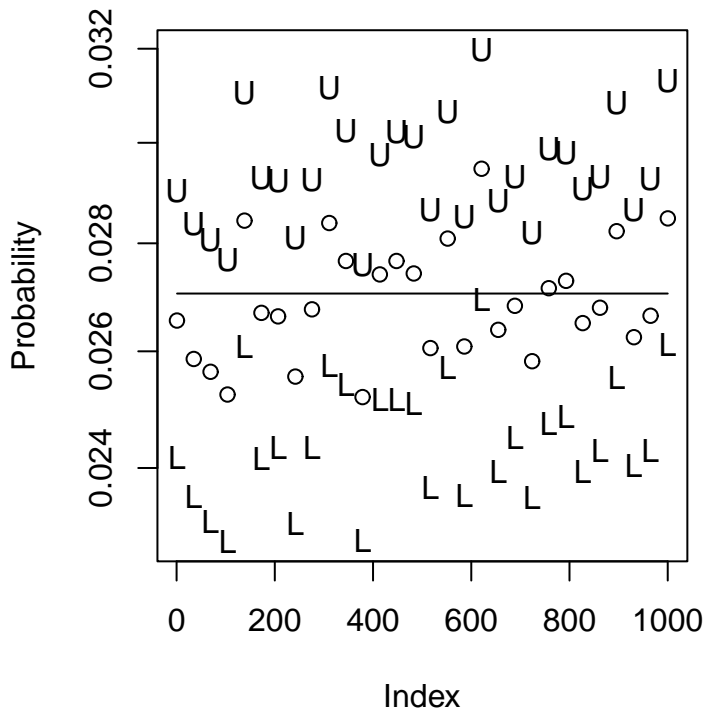

Supplement: 12859_2009_3529_MOESM6_ESM.pdf [file 12859_2009_3529_MOESM6_ESM.pdf]

**Gene5501**  
**Flat Prior**

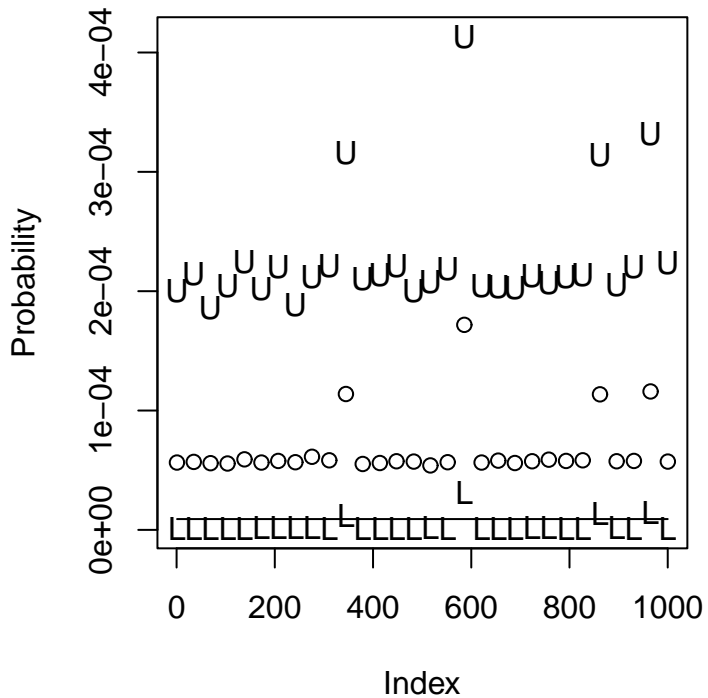

**Gene5501**  
**Tub Prior**

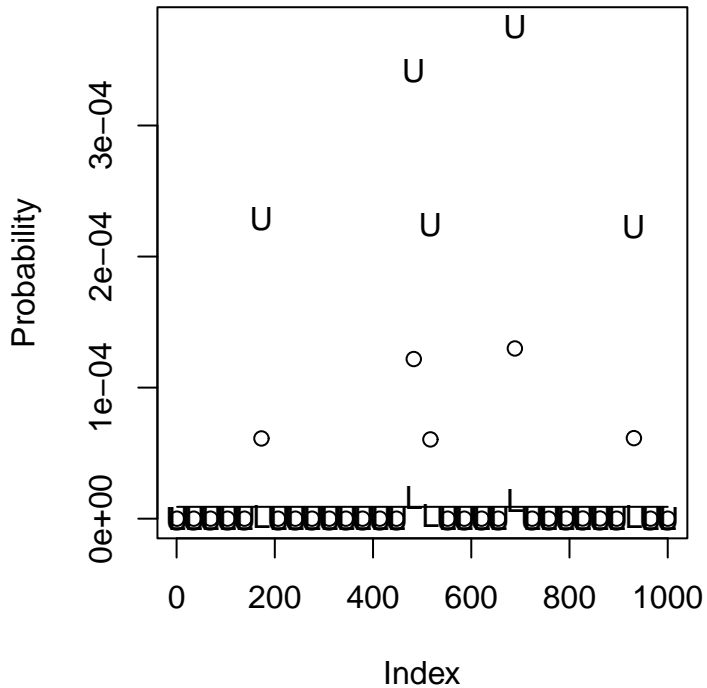

Supplement: 12859_2009_3529_MOESM7_ESM.pdf [file 12859_2009_3529_MOESM7_ESM.pdf]
